# Supplementary material for: Matrix assisted laser desorption ionization mass spectrometry imaging identifies markers of ageing and osteoarthritic cartilage
Source: Arthritis Res Ther. 2014 May 9;16(3):R110. doi: 10.1186/ar4560 (PMC4095688; doi:10.1186/ar4560)
Supplement: Additional file 1 — Microscopic (A) and macroscopic (B) evaluation of normal and OA cartilage samples. Tables containing gross and microscopic scores for the normal old and OA cartilage. [file ar4560-S1.pdf]

**Supplementary Table 1. Microscopic (A) and macroscopic (B) evaluation of normal and OA cartilage samples.** Numbers in parenthesis relate to the maximum score for that characteristic with higher scores equating to more severe changes.

**A**

| Donor    | Structure (/9) | Cellularity (/4) | Cloning (/4) | Total (/17) |
|----------|----------------|------------------|--------------|-------------|
| Normal 1 | 0              | 0                | 0            | 0           |
| Normal 2 | 0              | 0                | 0            | 0           |
| Normal 3 | 0              | 0                | 0            | 0           |
| OA 1     | 3              | 1                | 1            | 5           |
| OA 2     | 2              | 2                | 1            | 5           |
| OA 3     | 1              | 3                | 1            | 5           |

**B**

| Donor    | Wear lines (/3) | Erosions (/3) | Palmar arthrosis (/3) | Total (/9) |
|----------|-----------------|---------------|-----------------------|------------|
| Normal 1 | 0               | 0             | 0                     | 0          |
| Normal 2 | 0               | 0             | 0                     | 0          |
| Normal 3 | 0               | 0             | 0                     | 0          |
| OA 1     | 0               | 1             | 1                     | 1          |
| OA 2     | 0               | 1             | 1                     | 1          |
| OA 3     | 0               | 1             | 1                     | 1          |
